# Supplementary material
Source: PubMed Central journal article supplement (PMC1622821)

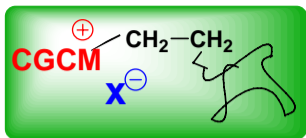

$\beta$ -H transfer

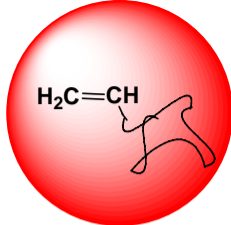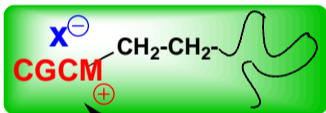

reinsertion

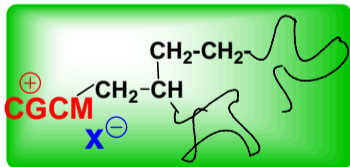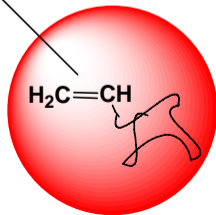

Supplement: pnas_0603396103_1.pdf [file pnas_0603396103_1.pdf]

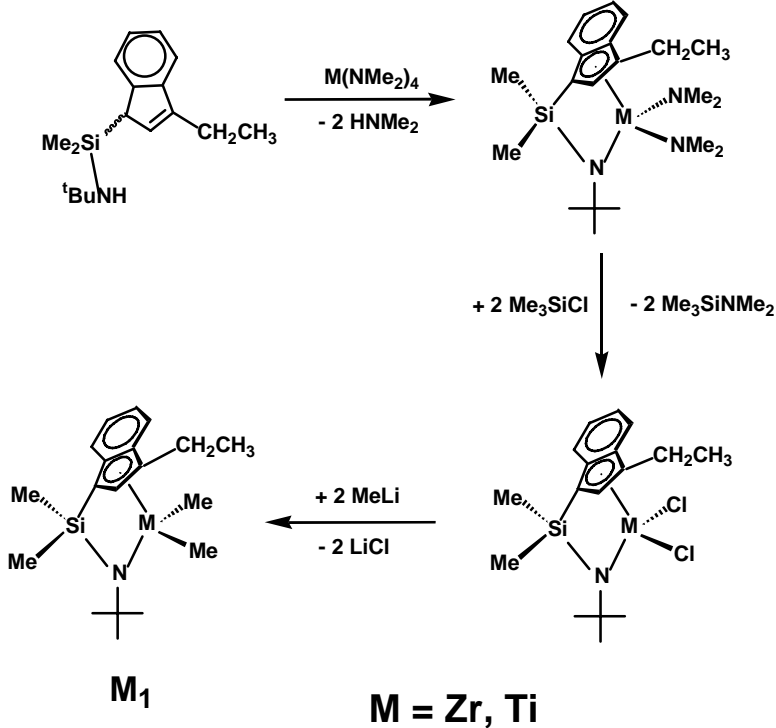

Supplement: pnas_0603396103_2.pdf [file pnas_0603396103_2.pdf]

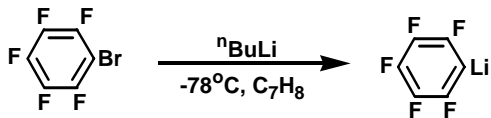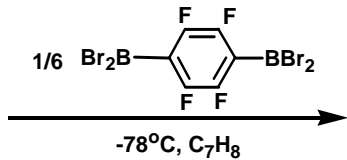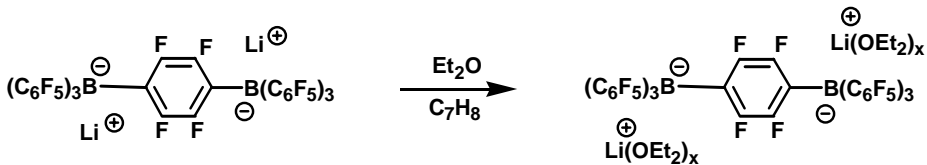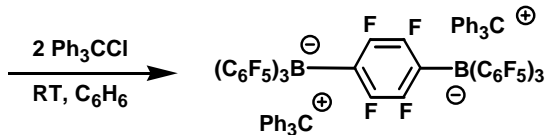

**B<sub>2</sub>**

Supplement: pnas_0603396103_3.pdf [file pnas_0603396103_3.pdf]

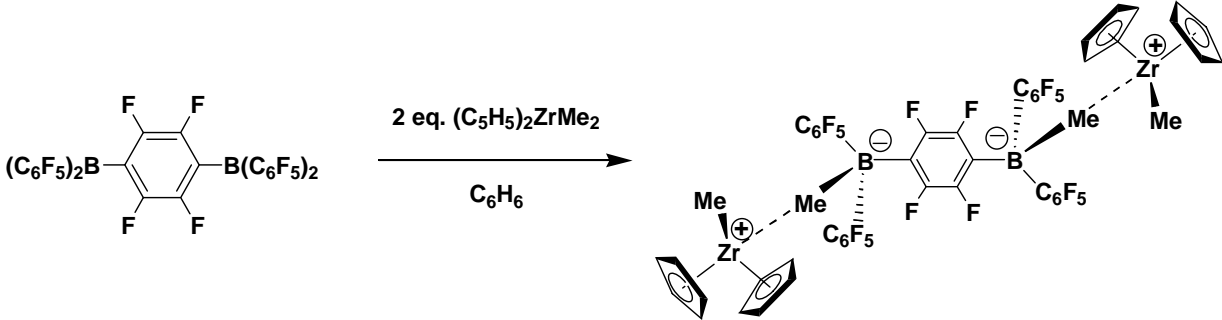

Supplement: pnas_0603396103_4.pdf [file pnas_0603396103_4.pdf]

**Branches/1000 C**

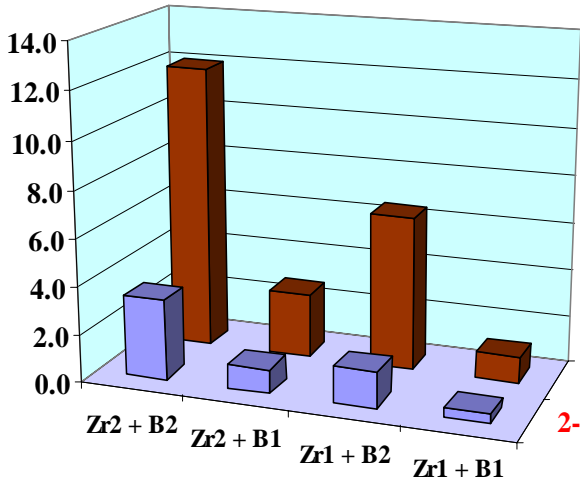

**Ethyl**  
**2-Ethyl**

**Catalyst**

Supplement: pnas_0603396103_5.pdf [file pnas_0603396103_5.pdf]

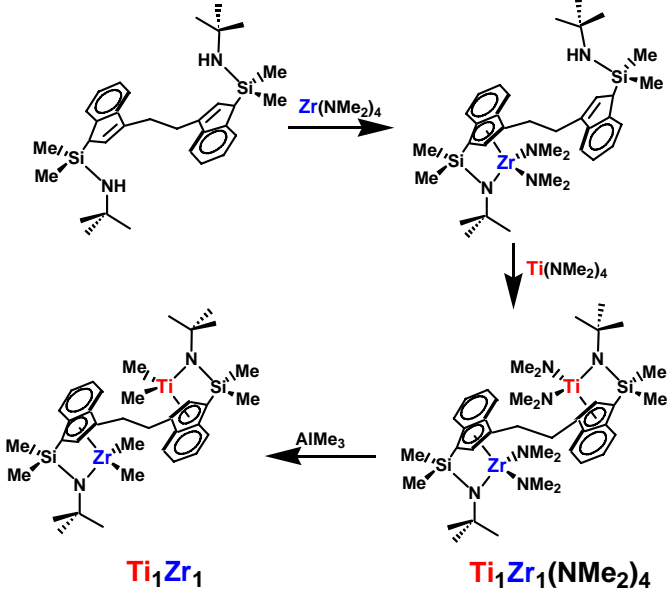

Supplement: pnas_0603396103_6.pdf [file pnas_0603396103_6.pdf]

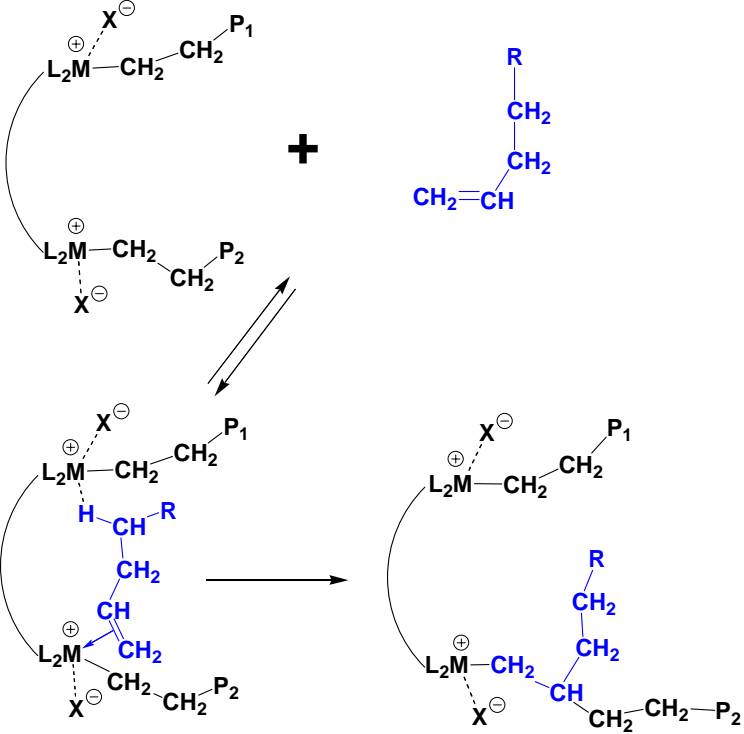

Supplement: pnas_0603396103_7.pdf [file pnas_0603396103_7.pdf]

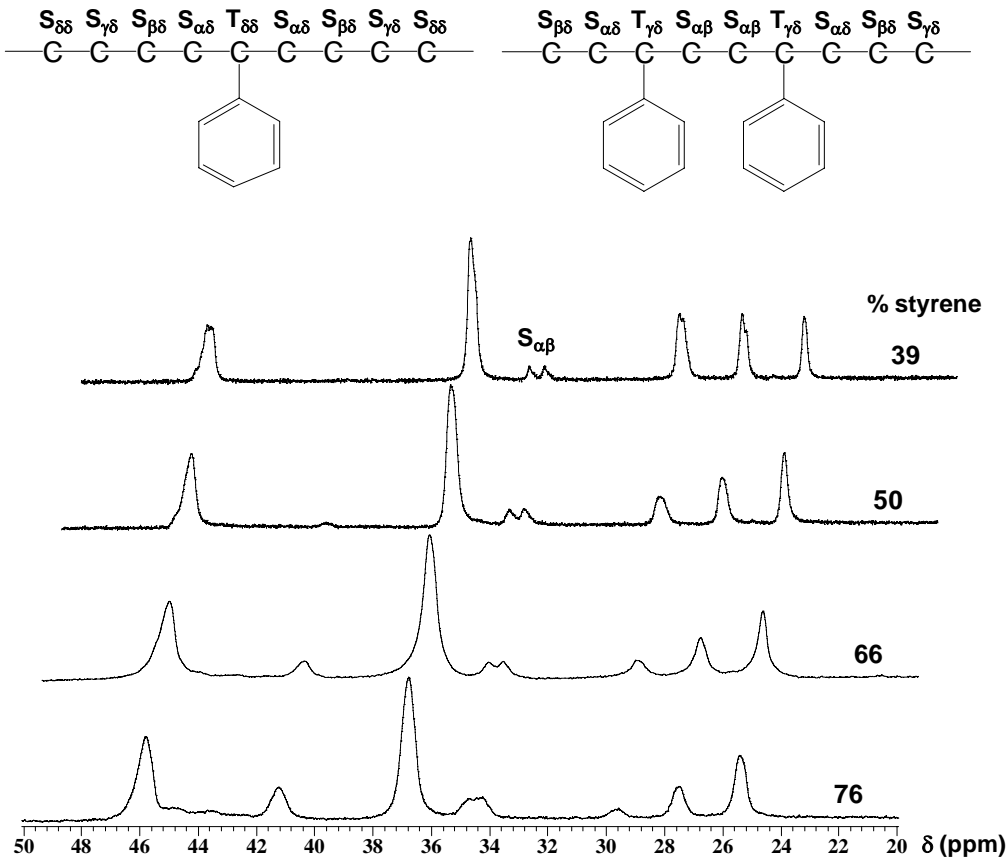

Supplement: pnas_0603396103_8.pdf [file pnas_0603396103_8.pdf]
